# Supplementary material
Source: HighWire-hosted journal article supplement (https://erj.ersjournals.com/content/56/2/2000493)
Supplement: inline-supplementary-material-1 [file inline-supplementary-material-1.pdf]

## Baseline Questionnaire

◆ Last Name \_\_\_\_\_ First name(s) \_\_\_\_\_ UID number \_\_\_\_\_

◆ Sex ☐ M ☐ F Polyclinic \_\_\_\_\_ Are you currently employed? ☐ Y ☐ N

◆ Access to a desktop computer, tablet or mobile phone that is internet enabled? ☐ Y ☐ N

◆ Do you have at least 4 months of care remaining? ☐ Y ☐ N

◆ Problem drug use ☐ Y ☐ N

◆ Alcohol misuse ☐ Y ☐ N

◆ Currently homeless ☐ Y ☐ N

◆ Currently in prison ☐ Y ☐ N

◆ Injectable drug regime ☐ Y ☐ N

◆ Please go through the following statements and circle the box that best describes your thoughts and feelings over the last two weeks:

|                                                   |                  |        |                  |       |                 |
|---------------------------------------------------|------------------|--------|------------------|-------|-----------------|
| 1. I've been feeling optimistic about the future* | None of the time | Rarely | Some of the time | Often | All of the time |
| 2. I've been feeling interested in other people*  | None of the time | Rarely | Some of the time | Often | All of the time |
| 3. I've been dealing with problems well*          | None of the time | Rarely | Some of the time | Often | All of the time |
| 4. I've been feeling good about myself*           | None of the time | Rarely | Some of the time | Often | All of the time |
| 5. I've been feeling close to other people*       | None of the time | Rarely | Some of the time | Often | All of the time |

◆ To what extent would you agree with the following statement?

|                                                                 |                   |                   |                            |                |                |
|-----------------------------------------------------------------|-------------------|-------------------|----------------------------|----------------|----------------|
| I am satisfied with the treatment that I am currently receiving | Strongly disagree | Somewhat disagree | Neither agree nor disagree | Somewhat agree | Strongly agree |
|-----------------------------------------------------------------|-------------------|-------------------|----------------------------|----------------|----------------|

◆ To help people say how good or bad a health state is, we have drawn a scale (rather like a thermometer) on which the best health state you can imagine is marked 100 and the worst state you can imagine is marked 0. Please indicate on this scale how good or bad your own health is today, in your opinion, by marking with an X on the scale (anywhere from 0 to 100):

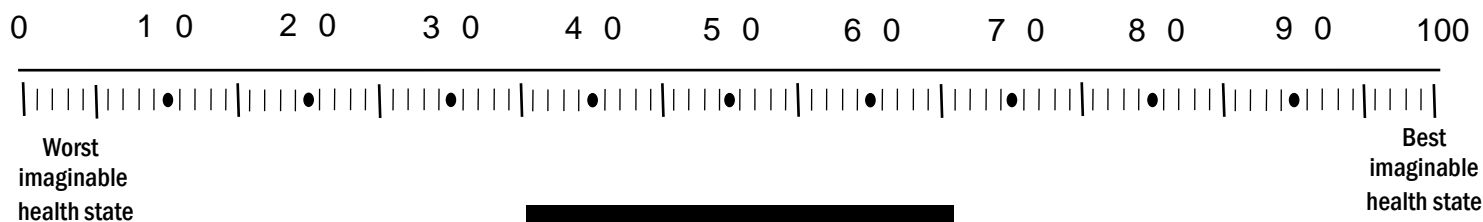

◆ Which of the following side effects did you experience during the continuation phase of your treatment? (please tick all that apply)

☐ Unusual Tiredness/ Loss of appetite

☐ Fever/ Chills/ Headache/ Dizziness

☐ Skin Rash, Severe Itching

☐ Numbness, Tingling in hands or feet

☐ Pain/ Swelling in the face or joints

☐ Eye Problems / blurring

☐ Stomach Pain, Nausea/Vomiting

☐ Yellow Skin or Dark Urine
