# Supplementary material
Source: HighWire-hosted journal article supplement (https://erj.ersjournals.com/content/56/2/2000493)
Supplement: inline-supplementary-material-2 [file inline-supplementary-material-2.pdf]

## Terapia Virtual Observată (TVO) – Fișa medicamentelor

Numele: \_\_\_\_\_ Nr. de caz: \_\_\_\_\_

### Medicamentele din faza de continuare:

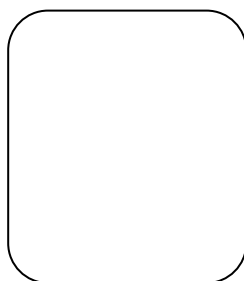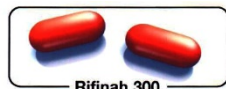

Rifinah 300

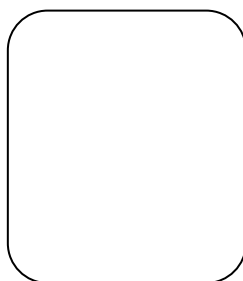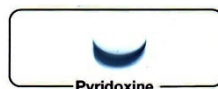

Pyridoxine

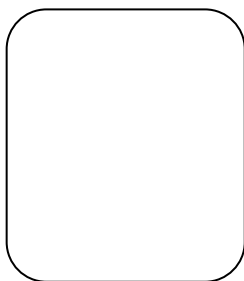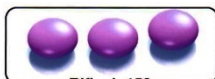

Rifinah 150

\_\_\_\_\_

Vă rugăm să raportați în timpul apelului video dacă aveți sau nu aveți oricare efecte secundare. Specificați numărul și efectul secundar pe care-l suferiți:

**1** = Probleme respiratorii – **Dacă da, întrerupeți medicamentul și chemați de urgență medicul.**

**2** = Îngălbinirea pielii sau ochilor și urină de culoare foarte închisă – **Dacă da, întrerupeți tratamentul și chemați de urgență medicul.**

**3** = Durere în burtă, grețuri și vomă.

**4** = Orice probleme de ochi: schimbări de vedere, vedere neclară, orbire, probleme de vedere sau durere în ochi.

**5** = Durere sau inflamație în regiunea feței sau articulațiilor.

**6** = Amorțeală, durere sau furnicături în mâini sau picioare.

**7** = Erupecie cutanată, mâncărime severă sau urticarie.

**8** = Dureri de cap sau amețeli.

**9** = Febră sau frisoane.

**10** = oboseală neobișnuită sau lipsa poftei de mâncare.

**11 = Niciunul** – Nu simt niciun efect secundar
