# Supplementary material
Source: HighWire-hosted journal article supplement (https://erj.ersjournals.com/content/56/2/2000493)
Supplement: inline-supplementary-material-3 [file inline-supplementary-material-3.pdf]

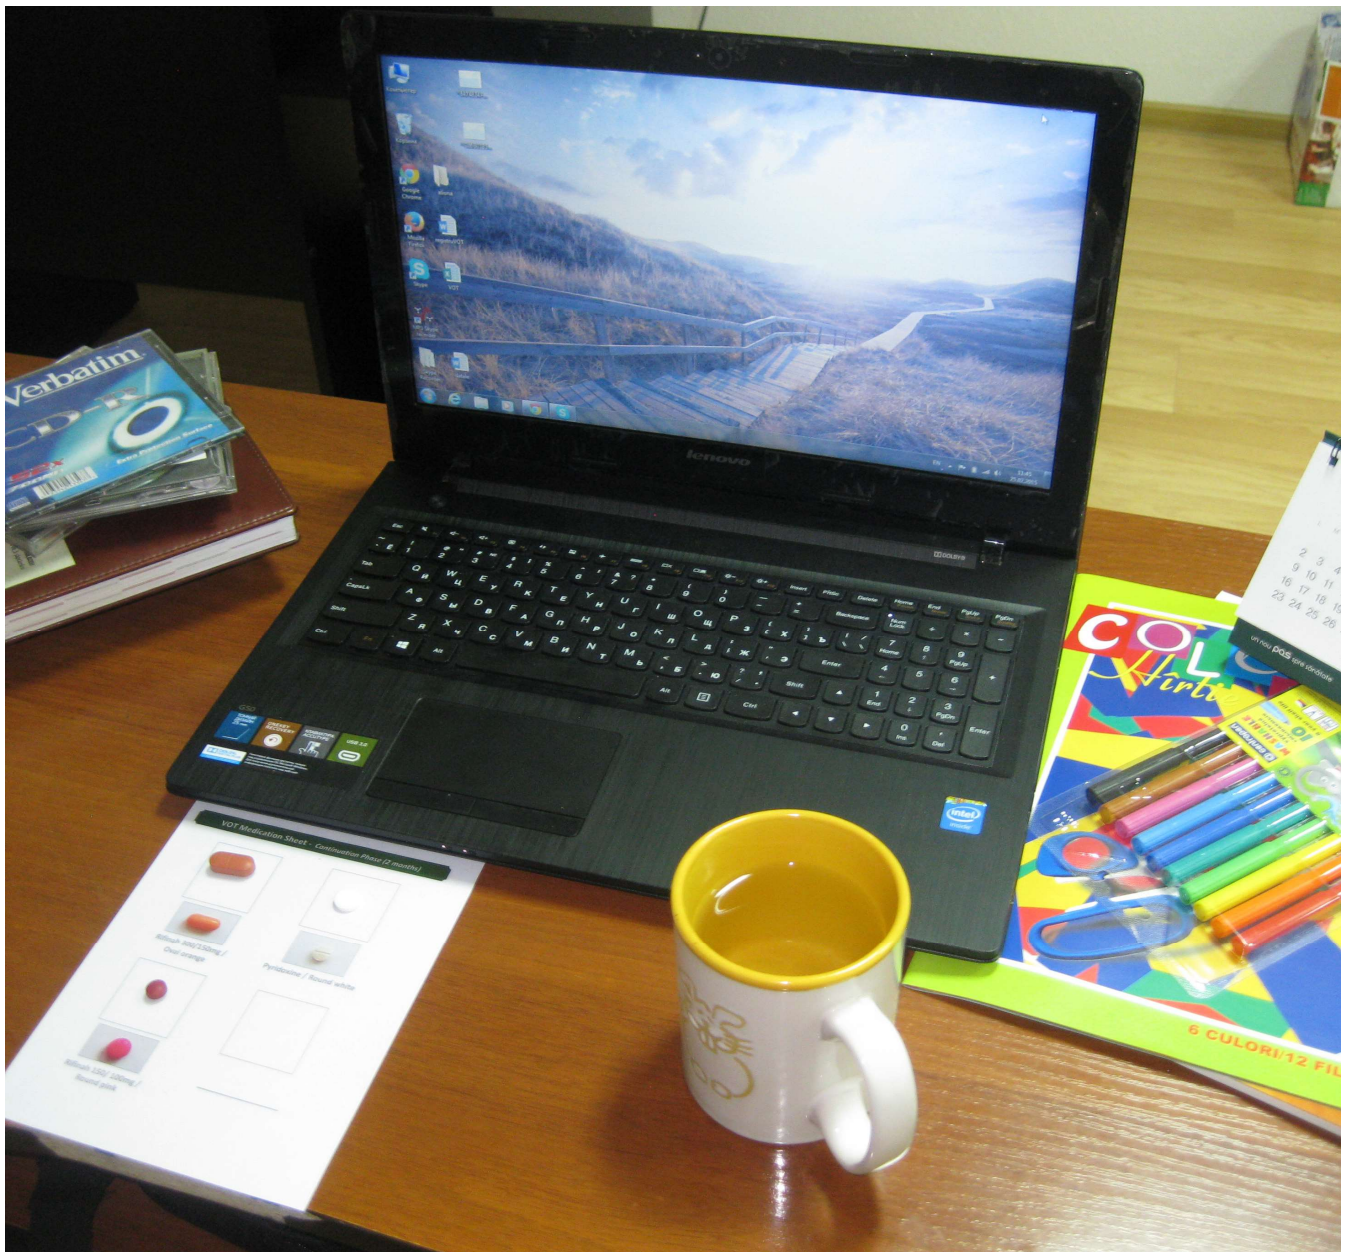

**Pregătiți-vă pentru primirea comprimatelor:**  
**plasați comprimatele pe foaie,**  
**paharul cu apă alături,**  
**plasați calculatorul/telefonul în loc bine**  
**iluminat**

## **Apel video**

**- Accesați Programul e-sănătate și apăsați butonul 'Video Call' (imagine screen-shot)**

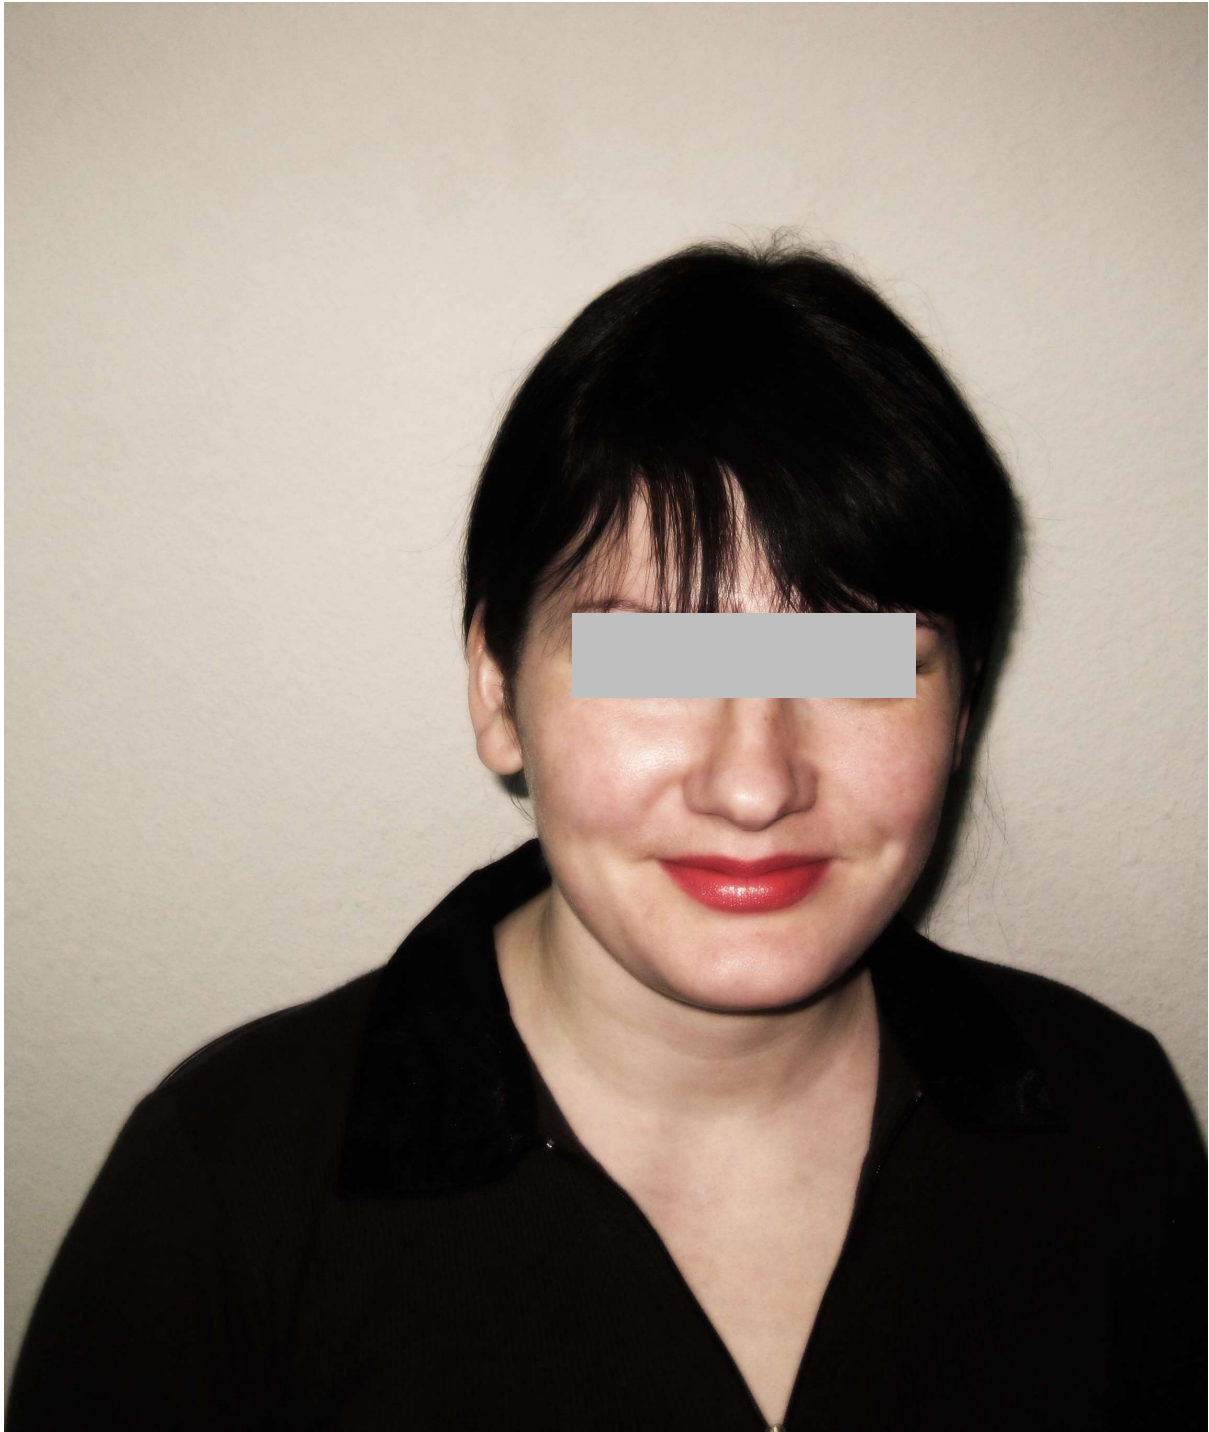

**Prezentați-vă - Spuneți numele Dvs. și numărul de  
comprimate pe care le veți administra  
*(Salut, sunt [numele]. Iau 4 pastile)***

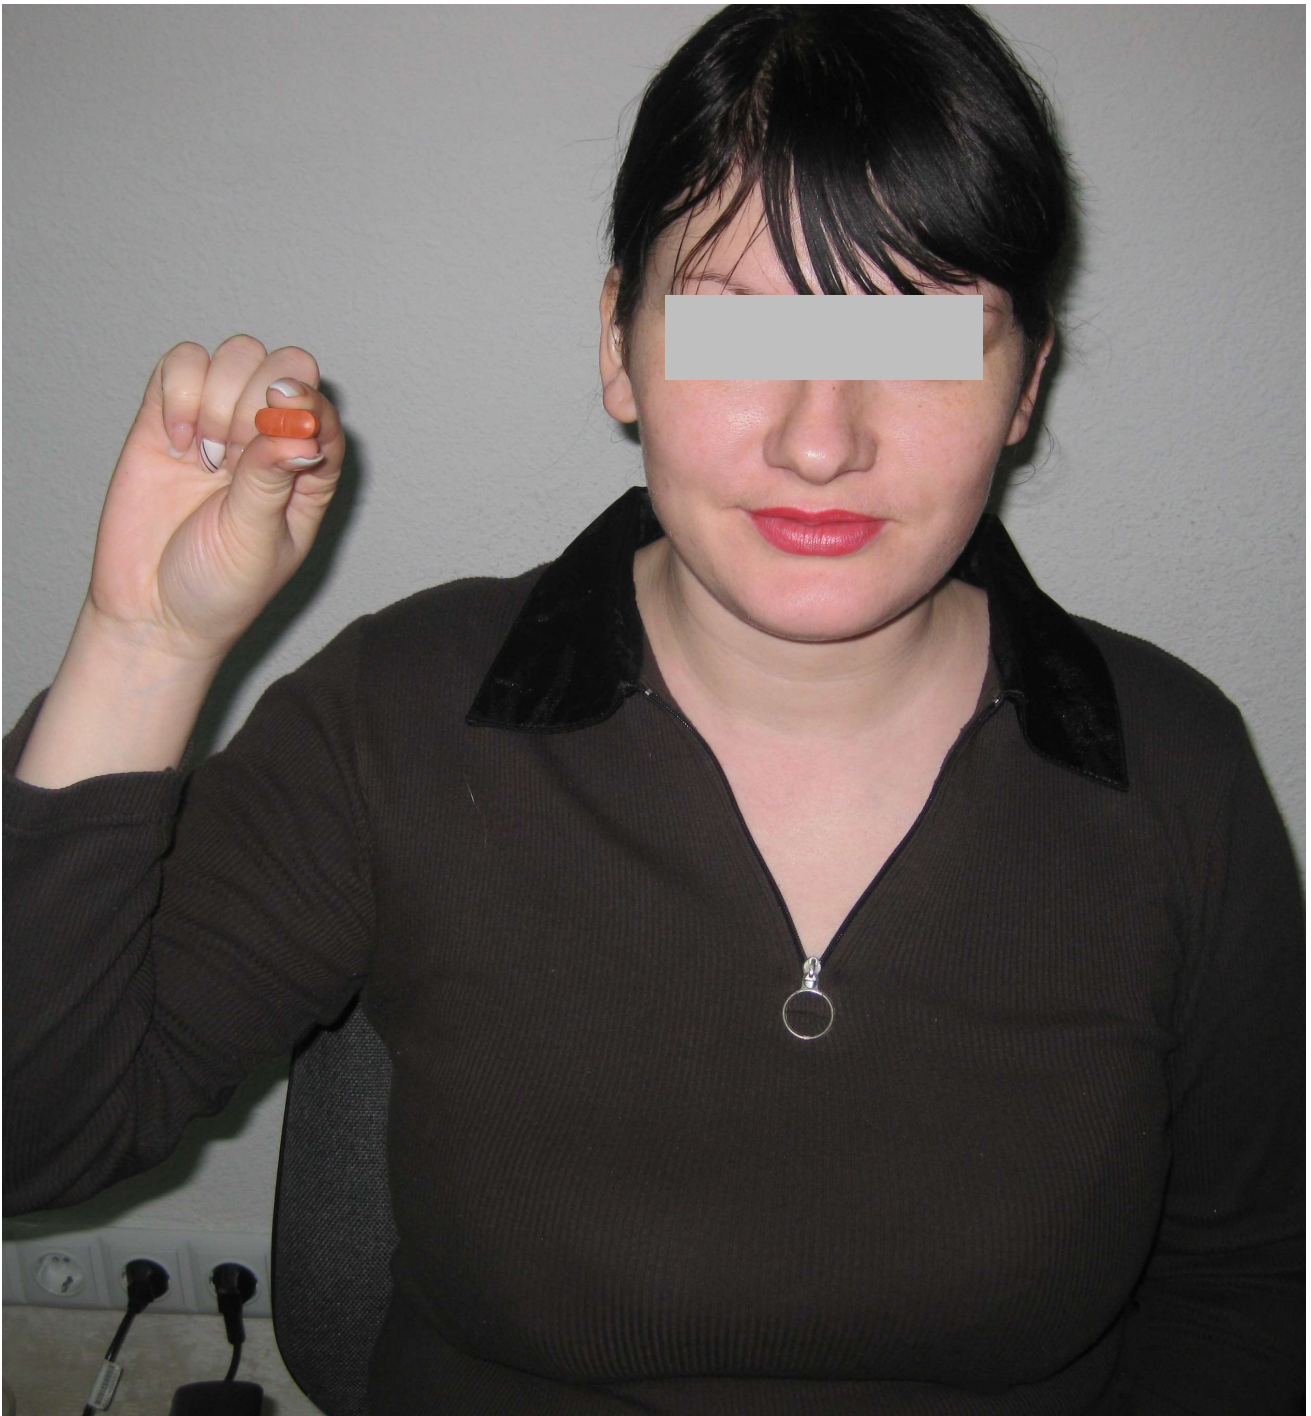

**Descrieți setul de pastile :**

**Arătați primul medicament și spuneți denumirea și numărul de pastile/dimensiunea, forma și culoarea acesteia.**

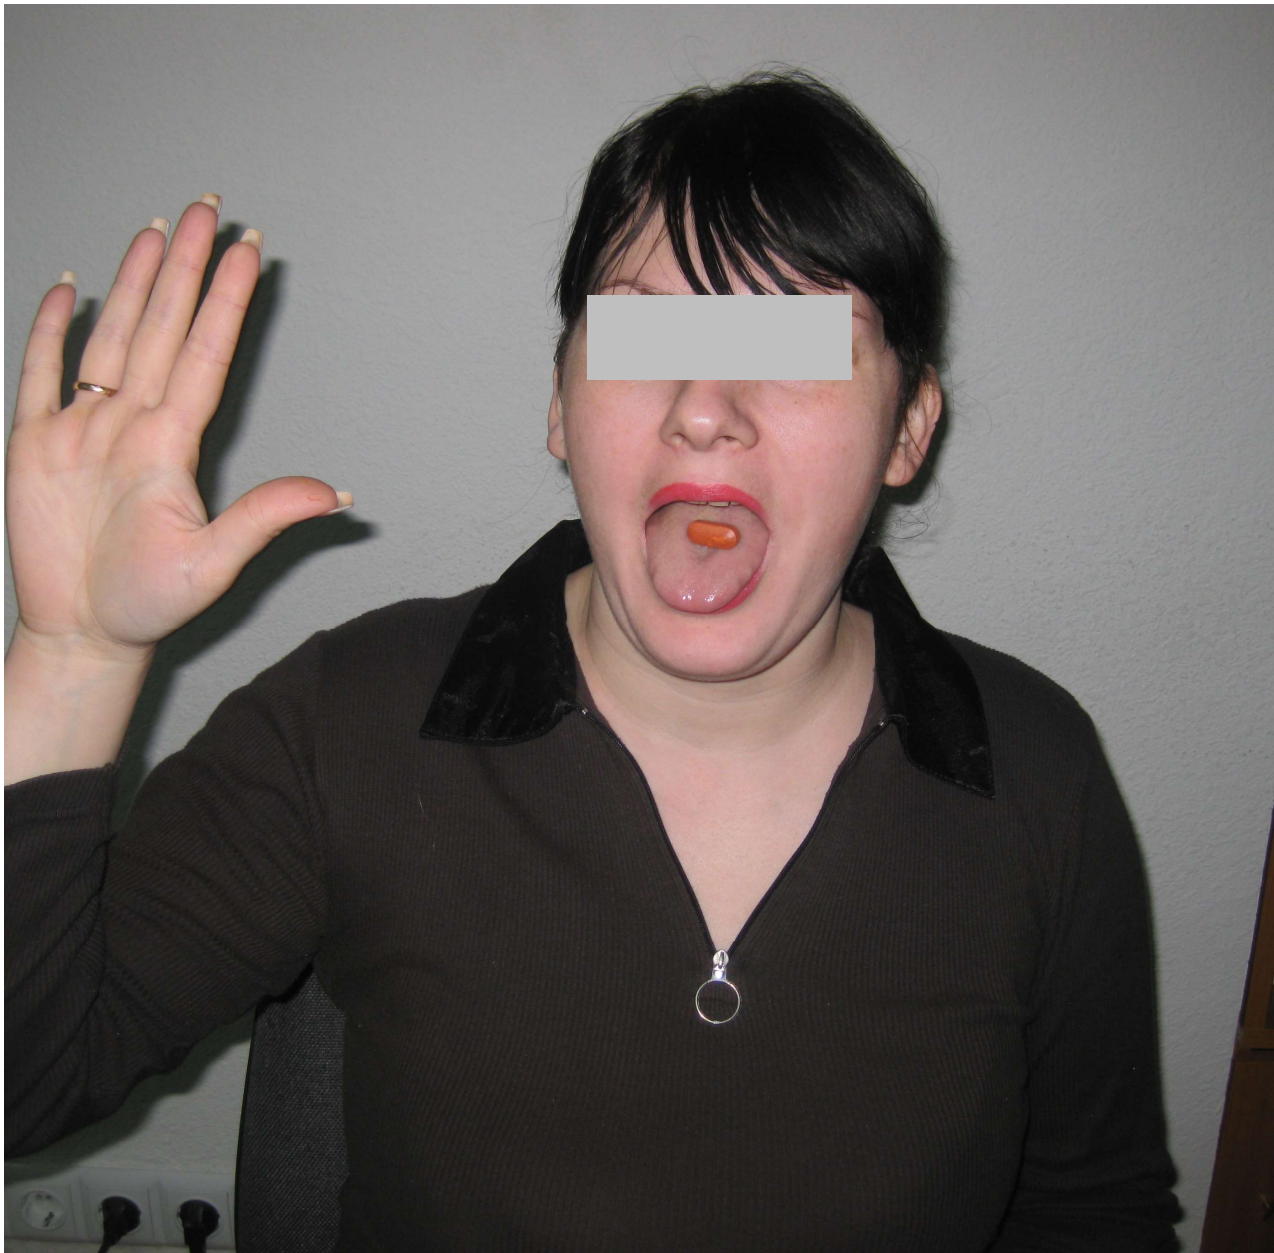

**Arătați** comprimatele pe limbă și mâinile.

**Înghițiți** comprimatele și  
arătați gura deschisă,  
mișcați limba în sus și în  
jos

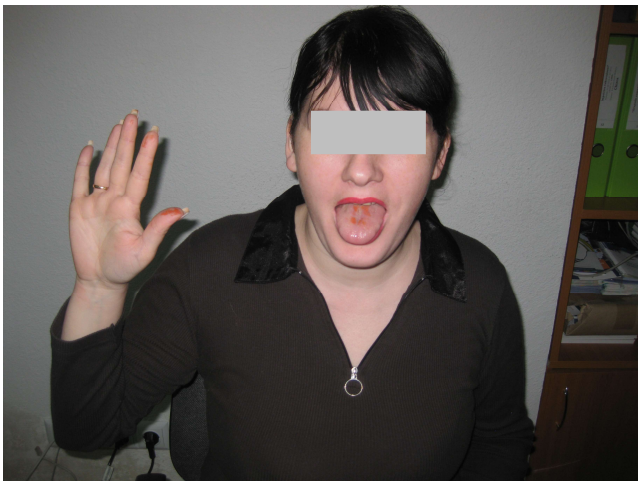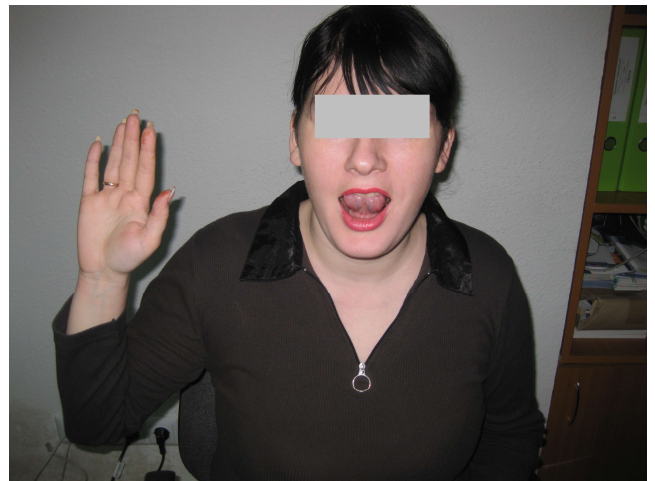

**Repetati procedura pentru toate  
medicamentele!**

# Bifați simptomele care le aveți:

|    | simptoame                                         | da | mesaj                                                |
|----|---------------------------------------------------|----|------------------------------------------------------|
| 1  | Oboseală neobișnuită, pierderea poftei de mâncare |    | Discutați cu medicul despre simptomele Dvs.!         |
| 2  | Febră, frisoane, dureri de cap, amețeli           |    | Discutați cu medicul despre simptomele Dvs.!         |
| 3  | Erupții pe piele                                  |    | Discutați cu medicul despre simptomele Dvs.!         |
| 4  | Amorțeli, furnicături în mâini sau/și picioare    |    | Discutați cu medicul despre simptomele Dvs.!         |
| 5  | Durere/inflamare a articulațiilor sau feței       |    | Discutați cu medicul despre simptomele Dvs.!         |
| 6  | Probleme cu vederea                               |    | Discutați cu medicul despre simptomele Dvs.!         |
| 7  | Dureri în abdomen/greață/vomă                     |    | Înterupeți tratamentul și urgent contactați medicul! |
| 8  | Îngălbinirea tegumentelor sau urină întunecată    |    |                                                      |
| 9  | Probleme respiratorii                             |    |                                                      |
| 10 | Mă simt bine, nu am nici                          |    | Ne revădem mâine!                                    |
