# Supplementary material
Source: HighWire-hosted journal article supplement (https://erj.ersjournals.com/content/56/2/2000493)
Supplement: inline-supplementary-material-5 [file inline-supplementary-material-5.pdf]

Table S4: Regression of Satisfaction Outcomes

|                                          | (1)<br>Satisfaction<br>(binary) | (2)<br>Satisfaction<br>(binary) | (3)<br>Satisfaction<br>(5-point scale) | (4)<br>Satisfaction<br>(5-point scale) |
|------------------------------------------|---------------------------------|---------------------------------|----------------------------------------|----------------------------------------|
| main                                     |                                 |                                 |                                        |                                        |
| VOT                                      | <b>16.878**</b><br>(17.536)     | 1.053 <sup>+</sup><br>(0.030)   | <b>3.209**</b><br>(0.528)              | <b>3.288**</b><br>(0.814)              |
| Age (in years)                           | 1.040 <sup>+</sup><br>(0.021)   | 1.001<br>(0.001)                | 0.036**<br>(0.012)                     | <b>0.042*</b><br>(0.018)               |
| Female                                   | 1.014<br>(0.541)                | 1.013<br>(0.029)                | -0.163<br>(0.375)                      | -0.318<br>(0.450)                      |
| Employed at baseline                     | 1.829<br>(1.132)                | 1.046<br>(0.030)                | 0.480<br>(0.429)                       | 0.499<br>(0.556)                       |
| =1 if satisfied at baseline (Binary)     |                                 | <b>2.034**</b><br>(0.206)       |                                        |                                        |
| Drug misuse problem at baseline          |                                 | 1.004<br>(0.017)                | <b>12.279**</b><br>(1.115)             | <b>14.702**</b><br>(1.247)             |
| Alcohol misuse problem at baseline       |                                 | 1.038<br>(0.033)                | <b>14.788**</b><br>(1.003)             | <b>14.207**</b><br>(1.079)             |
| Homeless at baseline                     |                                 | 0.936<br>(0.044)                | <b>-30.987**</b><br>(1.533)            | <b>-32.650**</b><br>(1.653)            |
| Satisfaction at baseline (5-point scale) |                                 |                                 |                                        | <b>3.249**</b><br>(0.596)              |
| Control group mean                       | 0.820                           | 0.820                           | 4.157                                  | 4.157                                  |
| Observations                             | 167                             | 172                             | 172                                    | 172                                    |

Standard errors in parentheses

Model: Columns 1 and 2: Logistic regression with heteroskedasticity robust standard errors, coefficients show odds ratios. Coefficients are omitted when they predict success perfectly/ are collinear; columns 3 and 4: Ordered logit with heteroskedasticity robust standard errors.

<sup>+</sup>  $p < 0.10$ , \*  $p < 0.05$ , \*\*  $p < 0.01$
