# Supplementary material
Source: HighWire-hosted journal article supplement (https://erj.ersjournals.com/content/56/2/2000493)
Supplement: inline-supplementary-material-6 [file inline-supplementary-material-6.pdf]

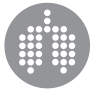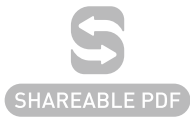

# Video-observed therapy and medication adherence for tuberculosis patients: randomised controlled trial in Moldova

Luke Ravenscroft<sup>1</sup>, Stewart Kettle<sup>1</sup>, Ruth Persian<sup>1</sup>, Simon Ruda<sup>1</sup>, Lilian Severin<sup>2</sup>, Svetlana Doltu<sup>2</sup>, Benjamin Schenck <sup>3</sup> and George Loewenstein<sup>3</sup>

**Affiliations:** <sup>1</sup>Behavioural Insights Team, London, UK. <sup>2</sup>Act For Involvement, Chişinău, Moldova. <sup>3</sup>Carnegie Mellon University, Pittsburgh, PA, USA.

**Correspondence:** Luke Ravenscroft, Behavioural Insights Team, 9 Raffles Place, Singapore 048619, Singapore. E-mail: luke.ravenscroft@bi.team

 @ERSpublications

**In this RCT, patients were assigned to either in-person observed treatment (as normal) or asynchronous video-observation. Observed medication adherence and satisfaction were improved and loss in patient time and costs during treatment were reduced.** <https://bit.ly/2Klmf18>

**Cite this article as:** Ravenscroft L, Kettle S, Persian R, *et al.* Video-observed therapy and medication adherence for tuberculosis patients: randomised controlled trial in Moldova. *Eur Respir J* 2020; 56: 2000493 [<https://doi.org/10.1183/13993003.00493-2020>].

This single-page version can be shared freely online.

## ABSTRACT

**Introduction:** The effectiveness of video-observed therapy (VOT) for treating tuberculosis (TB) has not been measured in low- and middle-income countries (LMICs), where >95% of TB cases and deaths occur. In this study, we analyse the effectiveness and patient cost-difference of VOT compared to clinic-based directly observed therapy (DOT) in improving medication adherence in Moldova, a LMIC in Eastern Europe.

**Methods:** The study was a two-arm individually randomised trial with 197 TB patients (n=99 DOT control group; n=98 VOT treatment group; multidrug-resistant TB cases were excluded). The primary outcome was observed medication adherence, measured by the number of days that a patient failed to be observed adhering to medication for every 2-week period during the course of their treatment.

**Results:** VOT significantly decreased nonadherence by 4 days (95% CI 3.35–4.67 days, p<0.01) per 2-week period: 5.24 days missed per 2-week period for DOT and 1.29 days for VOT. VOT patients spent MDL 504 (~EUR 25) (95% CI MDL 277–730, p<0.01) and 58 h (95% CI 48–68 h, p<0.01) less on their treatment. In addition, VOT increased self-reported satisfaction with treatment. We found no significant results pertaining to treatment success, patient wellbeing or patient employment status and some evidence of an increase in side-effects.

**Discussion:** In this trial, VOT increased observed medication adherence for TB patients in Moldova, a LMIC, when compared to clinic-based DOT. Additionally, VOT significantly reduced the time and money patients spent on their treatment.
